# Supplementary material for: Gradients of neurotransmitter receptor expression in the macaque cortex
Source: PubMed Central journal article supplement (PMC10322721; doi:10.1038/s41593-023-01351-2), 2023-06-19
Supplement: 41593_2023_1351_MOESM2_ESM.pdf [file 41593_2023_1351_MOESM2_ESM.pdf]

## Reporting Summary

Nature Research wishes to improve the reproducibility of the work that we publish. This form provides structure for consistency and transparency in reporting. For further information on Nature Research policies, see our [Editorial Policies](#) and the [Editorial Policy Checklist](#).

### Statistics

For all statistical analyses, confirm that the following items are present in the figure legend, table legend, main text, or Methods section.

n/a Confirmed

- The exact sample size ( $n$ ) for each experimental group/condition, given as a discrete number and unit of measurement
- A statement on whether measurements were taken from distinct samples or whether the same sample was measured repeatedly
- The statistical test(s) used AND whether they are one- or two-sided  
*Only common tests should be described solely by name; describe more complex techniques in the Methods section.*
- A description of all covariates tested
- A description of any assumptions or corrections, such as tests of normality and adjustment for multiple comparisons
- A full description of the statistical parameters including central tendency (e.g. means) or other basic estimates (e.g. regression coefficient) AND variation (e.g. standard deviation) or associated estimates of uncertainty (e.g. confidence intervals)
- For null hypothesis testing, the test statistic (e.g.  $F$ ,  $t$ ,  $r$ ) with confidence intervals, effect sizes, degrees of freedom and  $P$  value noted  
*Give  $P$  values as exact values whenever suitable.*
- For Bayesian analysis, information on the choice of priors and Markov chain Monte Carlo settings
- For hierarchical and complex designs, identification of the appropriate level for tests and full reporting of outcomes
- Estimates of effect sizes (e.g. Cohen's  $d$ , Pearson's  $r$ ), indicating how they were calculated

*Our web collection on [statistics for biologists](#) contains articles on many of the points above.*

### Software and code

Policy information about [availability of computer code](#)

**Data collection** Software: Axiovision (4.8.2), Matlab (R2019b), Systat (v13), Human Connectome Project software (connectome workbench software, v1.5.0), Registration Fusion (RF) v0.18.1 ([https://github.com/ThomasYeoLab/CBIG/tree/master/stable\\_projects/registration/Wu2017\\_RegistrationFusion](https://github.com/ThomasYeoLab/CBIG/tree/master/stable_projects/registration/Wu2017_RegistrationFusion)); Advanced Normalization Tools (ANTs; version RF-ANTs); Freesurfer (v7)  
Online Data sources: <https://core-nets.org>; <https://balsa.wustl.edu/study/W336>; <https://surfer.nmr.mgh.harvard.edu/fswiki/AllenBrainAtlas>; Allen Brain Map; <https://search.kg.ebrains.eu/instances/e39a0407-a98a-480e-9c63-4a2225ddfb4>; human meta-analysis database (<https://neuroquery.org/>)

**Data analysis** Code used for data integration and analysis in this study is available on GitHub ([github.com/seanfw/receptorgradients](https://github.com/seanfw/receptorgradients), [github.com/seanfw/genemapper](https://github.com/seanfw/genemapper)).

For manuscripts utilizing custom algorithms or software that are central to the research but not yet described in published literature, software must be made available to editors and reviewers. We strongly encourage code deposition in a community repository (e.g. GitHub). See the Nature Research [guidelines for submitting code & software](#) for further information.

### Data

Policy information about [availability of data](#)

All manuscripts must include a [data availability statement](#). This statement should provide the following information, where applicable:

- Accession codes, unique identifiers, or web links for publicly available datasets
- A list of figures that have associated raw data
- A description of any restrictions on data availability

Data used for the analyses presented in this study is available in table format in the Source data file associated with the article (FroudWalsh\_SourceData\_Fig1.xlsx). It is also available via Balsa (Study ID: P2NqI, <https://balsa.wustl.edu/study/P2NqI>) and the EBRAINS platform (<https://>

## Field-specific reporting

Please select the one below that is the best fit for your research. If you are not sure, read the appropriate sections before making your selection.

Life sciences  Behavioural & social sciences  Ecological, evolutionary & environmental sciences

For a reference copy of the document with all sections, see [nature.com/documents/nr-reporting-summary-flat.pdf](https://nature.com/documents/nr-reporting-summary-flat.pdf)

## Life sciences study design

All studies must disclose on these points even when the disclosure is negative.

|                 |                                                                                                                                                                                                                                                                                                                                                                                      |
|-----------------|--------------------------------------------------------------------------------------------------------------------------------------------------------------------------------------------------------------------------------------------------------------------------------------------------------------------------------------------------------------------------------------|
| Sample size     | n = 3 for receptor data from <i>Macaca fascicularis</i> specimens. n = 6 for data from rat specimens. n = 5 for data from human specimens. Other data was previously described elsewhere (cited in manuscript). No statistical methods were used to pre-determine sample sizes but our sample sizes are similar to those reported in previous publications (cited in the manuscript) |
| Data exclusions | None.                                                                                                                                                                                                                                                                                                                                                                                |
| Replication     | None. A replication would require the sacrifice of further monkeys and rats, and this would not be ethically justifiable                                                                                                                                                                                                                                                             |
| Randomization   | N/A. We analyzed data from a single experimental group. Thus, randomization was not necessary.                                                                                                                                                                                                                                                                                       |
| Blinding        | N/A. We analyzed data from a single experimental group. Thus, randomization was not necessary.                                                                                                                                                                                                                                                                                       |

## Reporting for specific materials, systems and methods

We require information from authors about some types of materials, experimental systems and methods used in many studies. Here, indicate whether each material, system or method listed is relevant to your study. If you are not sure if a list item applies to your research, read the appropriate section before selecting a response.

### Materials & experimental systems

### Methods

|                                     |                                                                 |                                     |                                                            |
|-------------------------------------|-----------------------------------------------------------------|-------------------------------------|------------------------------------------------------------|
| n/a                                 | Included in the study                                           | n/a                                 | Included in the study                                      |
| <input checked="" type="checkbox"/> | <input type="checkbox"/> Antibodies                             | <input checked="" type="checkbox"/> | <input type="checkbox"/> ChIP-seq                          |
| <input checked="" type="checkbox"/> | <input type="checkbox"/> Eukaryotic cell lines                  | <input checked="" type="checkbox"/> | <input type="checkbox"/> Flow cytometry                    |
| <input checked="" type="checkbox"/> | <input type="checkbox"/> Palaeontology and archaeology          | <input type="checkbox"/>            | <input checked="" type="checkbox"/> MRI-based neuroimaging |
| <input type="checkbox"/>            | <input checked="" type="checkbox"/> Animals and other organisms |                                     |                                                            |
| <input type="checkbox"/>            | <input checked="" type="checkbox"/> Human research participants |                                     |                                                            |
| <input checked="" type="checkbox"/> | <input type="checkbox"/> Clinical data                          |                                     |                                                            |
| <input checked="" type="checkbox"/> | <input type="checkbox"/> Dual use research of concern           |                                     |                                                            |

## Animals and other organisms

Policy information about [studies involving animals](#); [ARRIVE guidelines](#) recommended for reporting animal research

|                         |                                                                                                                                                                                                                         |
|-------------------------|-------------------------------------------------------------------------------------------------------------------------------------------------------------------------------------------------------------------------|
| Laboratory animals      | Adult (8, 7 and 7 years old) male <i>Macaca fascicularis</i> specimens. Adult (exact age not available) male Lewis rats.                                                                                                |
| Wild animals            | The study did not involve wild animals.                                                                                                                                                                                 |
| Field-collected samples | The study did not involve samples collected in the field.                                                                                                                                                               |
| Ethics oversight        | The procedures used in this study had the approval of the Institutional Animal Care and Use Committee and were carried out in accordance with the European Council Directive of 2010. Covance Preclinical Services GmbH |

Note that full information on the approval of the study protocol must also be provided in the manuscript.

## Human research participants

Policy information about [studies involving human research participants](#)

|                            |                                                                                                                                                         |
|----------------------------|---------------------------------------------------------------------------------------------------------------------------------------------------------|
| Population characteristics | We examined a total of 5 post-mortem human brains from subjects (76±3 years of age; 3 males) without a history of neurological or psychiatric diseases. |
|----------------------------|---------------------------------------------------------------------------------------------------------------------------------------------------------|

|                  |                                                                                                                             |
|------------------|-----------------------------------------------------------------------------------------------------------------------------|
| Recruitment      | Brain samples were obtained through the body donor program of the Department of Anatomy, University of Düsseldorf, Germany. |
| Ethics oversight | The use of these samples was approved by the Ethics board of the Medical Faculty of the University of Düsseldorf, Germany.  |

Note that full information on the approval of the study protocol must also be provided in the manuscript.

## Magnetic resonance imaging

### Experimental design

|                                 |                                                                                                                                                                      |
|---------------------------------|----------------------------------------------------------------------------------------------------------------------------------------------------------------------|
| Design type                     | We re-used previously published and publicly available structural and resting-state functional MRI datasets.                                                         |
| Design specifications           | Full description of the MRI data is available in the papers by Xu et al., NeuroImage, 2020 and Glasser and Van Essen, J. Neurosci, 2011 as cited in the manuscript . |
| Behavioral performance measures | N/A.                                                                                                                                                                 |

### Acquisition

|                               |                                                                                                                                                                      |
|-------------------------------|----------------------------------------------------------------------------------------------------------------------------------------------------------------------|
| Imaging type(s)               | structural (T1w/T2w) and resting-state fMRI                                                                                                                          |
| Field strength                | Full description of the MRI data is available in the papers by Xu et al., NeuroImage, 2020 and Glasser and Van Essen, J. Neurosci, 2011 as cited in the manuscript . |
| Sequence & imaging parameters | Full description of the MRI data is available in the papers by Xu et al., NeuroImage, 2020 and Glasser and Van Essen, J. Neurosci, 2011 as cited in the manuscript . |
| Area of acquisition           | whole brain.                                                                                                                                                         |
| Diffusion MRI                 | <input type="checkbox"/> Used <input checked="" type="checkbox"/> Not used                                                                                           |

### Preprocessing

|                            |                                                                                                                                                                                  |
|----------------------------|----------------------------------------------------------------------------------------------------------------------------------------------------------------------------------|
| Preprocessing software     | We re-used fully pre-processed data. Preprocessing is described completely in Xu et al., NeuroImage, 2020, and Glasser and Van Essen, J. Neurosci, 2011, as cited in manuscript. |
| Normalization              | We re-used fully pre-processed data. Preprocessing is described completely in Xu et al., NeuroImage, 2020, and Glasser and Van Essen, J. Neurosci, 2011, as cited in manuscript. |
| Normalization template     | We re-used fully pre-processed data. Preprocessing is described completely in Xu et al., NeuroImage, 2020, and Glasser and Van Essen, J. Neurosci, 2011 as cited in manuscript.  |
| Noise and artifact removal | We re-used fully pre-processed data. Preprocessing is described completely in Xu et al., NeuroImage, 2020, and Glasser and Van Essen, J. Neurosci, 2011 as cited in manuscript.  |
| Volume censoring           | We re-used fully pre-processed data. Preprocessing is described completely in Xu et al., NeuroImage, 2020, and Glasser and Van Essen, J. Neurosci, 2011, as cited in manuscript. |

### Statistical modeling & inference

|                                                                           |                                                                                                                                                   |
|---------------------------------------------------------------------------|---------------------------------------------------------------------------------------------------------------------------------------------------|
| Model type and settings                                                   | We used output from the study of Xu et al., NeuroImage, 2020. They used diffusion map embedding to identify gradients of functional connectivity. |
| Effect(s) tested                                                          | N/A                                                                                                                                               |
| Specify type of analysis:                                                 | <input checked="" type="checkbox"/> Whole brain <input type="checkbox"/> ROI-based <input type="checkbox"/> Both                                  |
| Statistic type for inference<br>(See <a href="#">Eklund et al. 2016</a> ) | N/A                                                                                                                                               |
| Correction                                                                | N/A                                                                                                                                               |

### Models & analysis

|                                     |                                                                              |
|-------------------------------------|------------------------------------------------------------------------------|
| n/a                                 | Involvement in the study                                                     |
| <input type="checkbox"/>            | <input checked="" type="checkbox"/> Functional and/or effective connectivity |
| <input checked="" type="checkbox"/> | <input type="checkbox"/> Graph analysis                                      |
| <input checked="" type="checkbox"/> | <input type="checkbox"/> Multivariate modeling or predictive analysis        |

Thresholded functional connectivity matrices (based on Pearson correlations) were used to create joint-similarity matrices. See Methods and Xu et al., NeuroImage, 2020 for details.
